# Supplementary material
Source: Research Square preprint supplement (doi:10.21203/rs.3.rs-9045027/v1)
Supplement: Supplementary file 1 [file 47c489744a147cd17332191b.docx]

# Supporting Information

**In situ electrochemical activation converts carbon disulfide into an organosulfide cathode material for rechargeable lithium-organosulfide batteries**


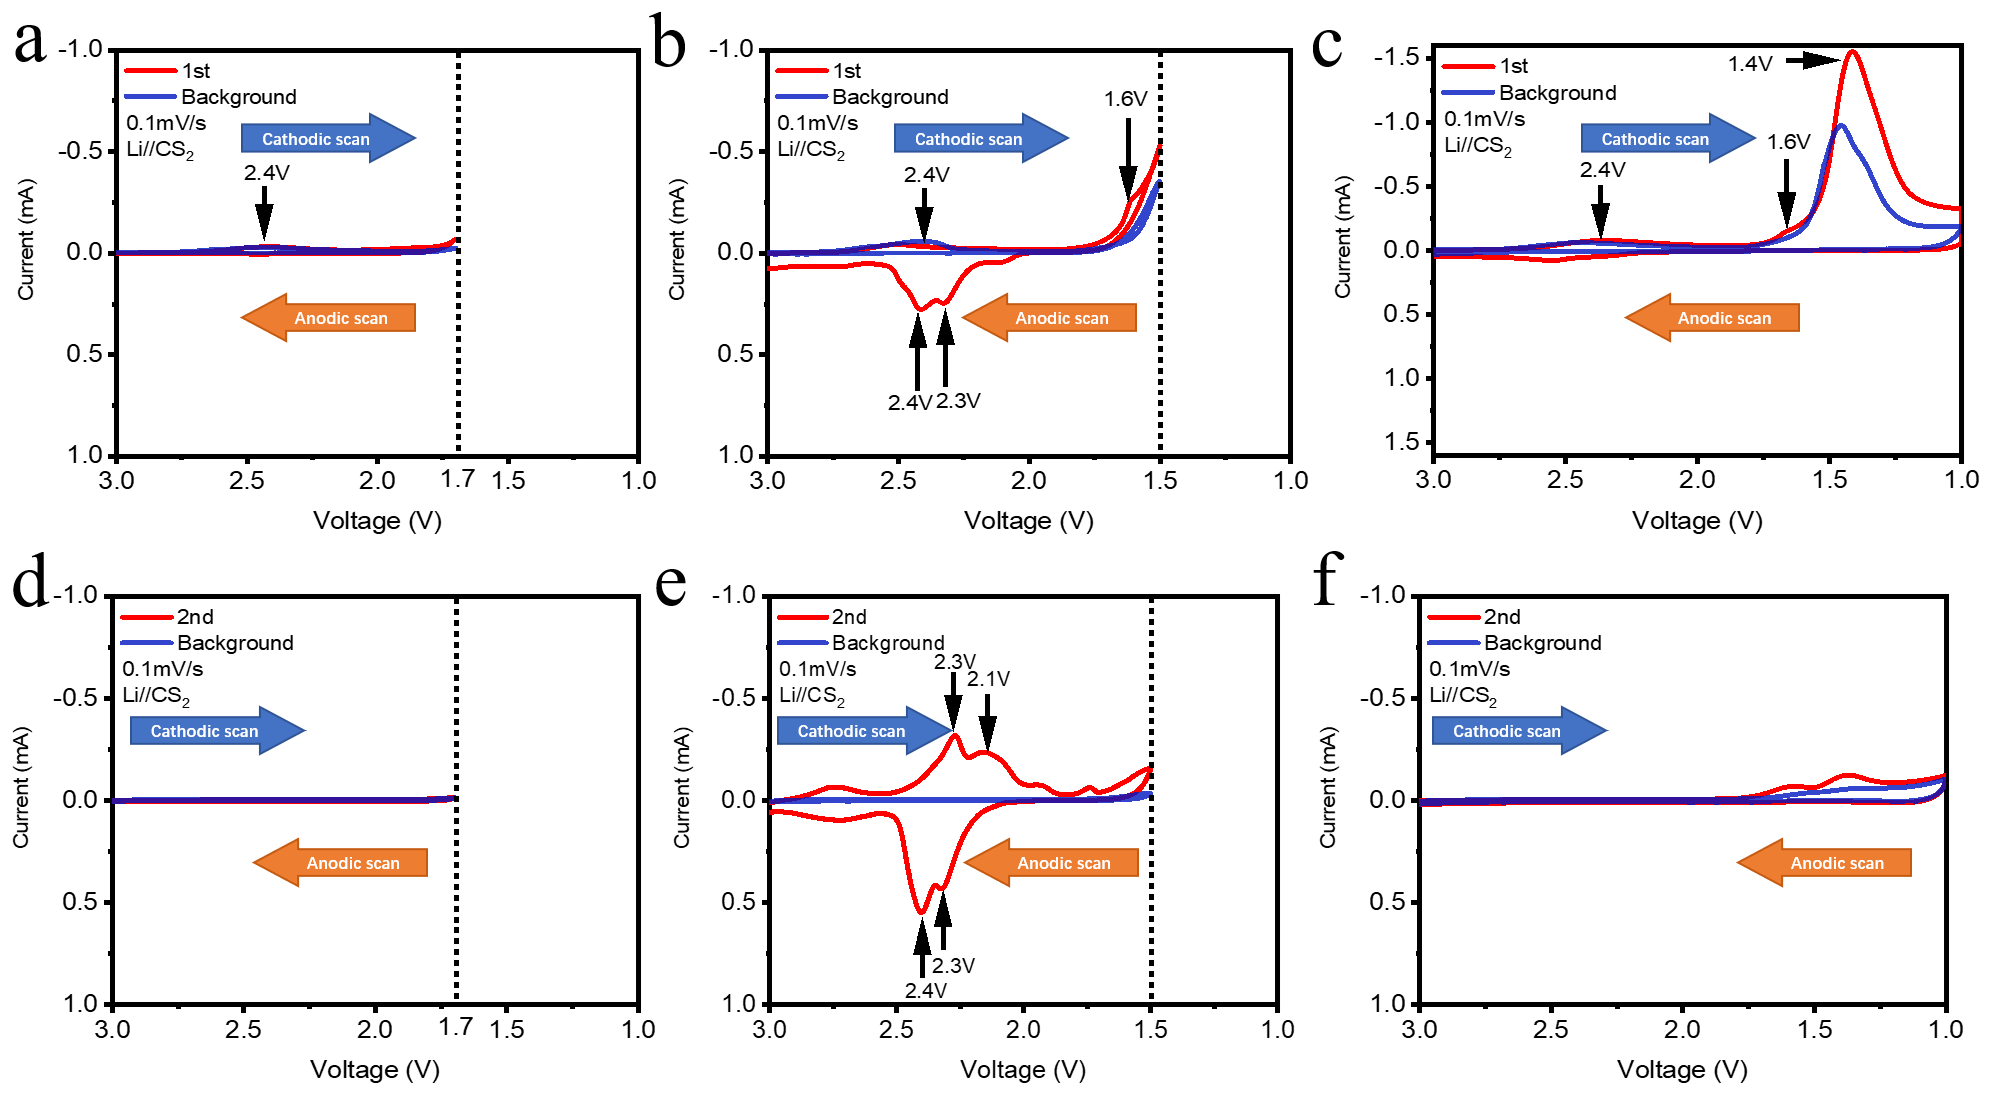


**Figure S1.** The first-cycle CV in a Li//CS2 battery under different scanning ranges. (a) scanning range 3.0-1.7 V vs Li/Li+; (b) scanning range 3.0-1.5 V vs Li/Li+; (c) scanning range 3.0-1.0 V vs Li/Li+; the second cycle cyclic voltammetry of the Li//CS2 battery in different scanning ranges: (d) scanning range 3.0-1.7 V vs Li/Li+; (e) scanning range 3.0-1.5 V vs Li/Li+; (f) scanning range 3.0-1.0 V vs Li/Li+. (The background curve is obtained from control batteries using electrolyte without CS2, while maintaining identical electrode configurations to those in the Li//CS2 battery)


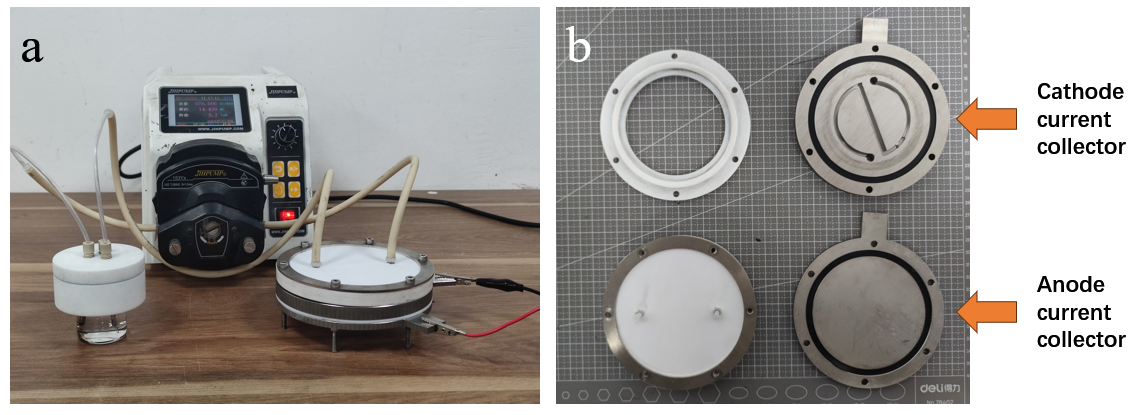


**Figure S2.** (a) Graphic of a collection device; (b) Internal structure of collection device.


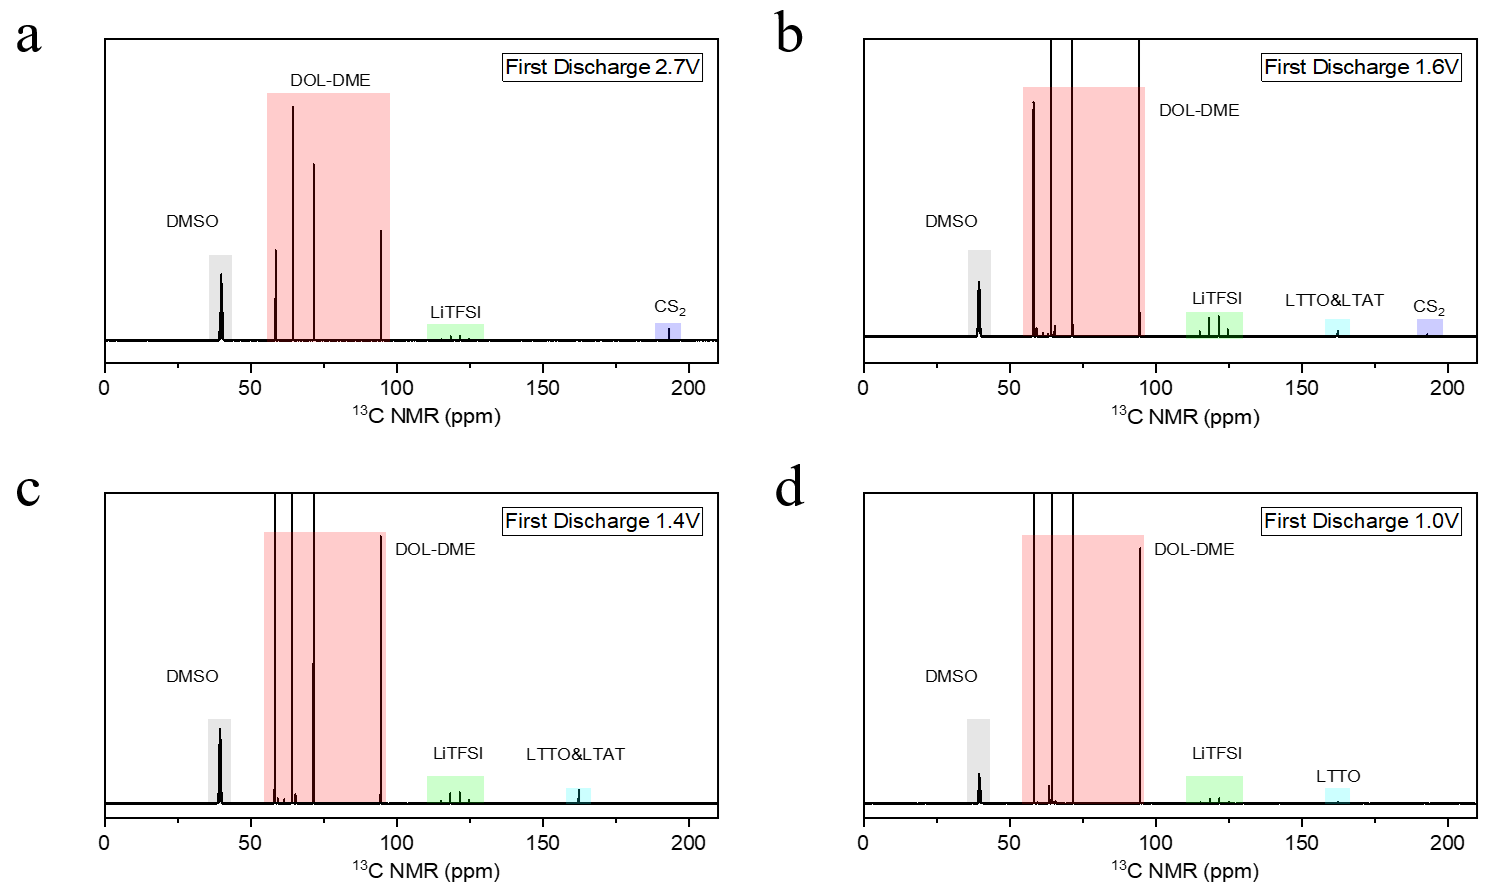

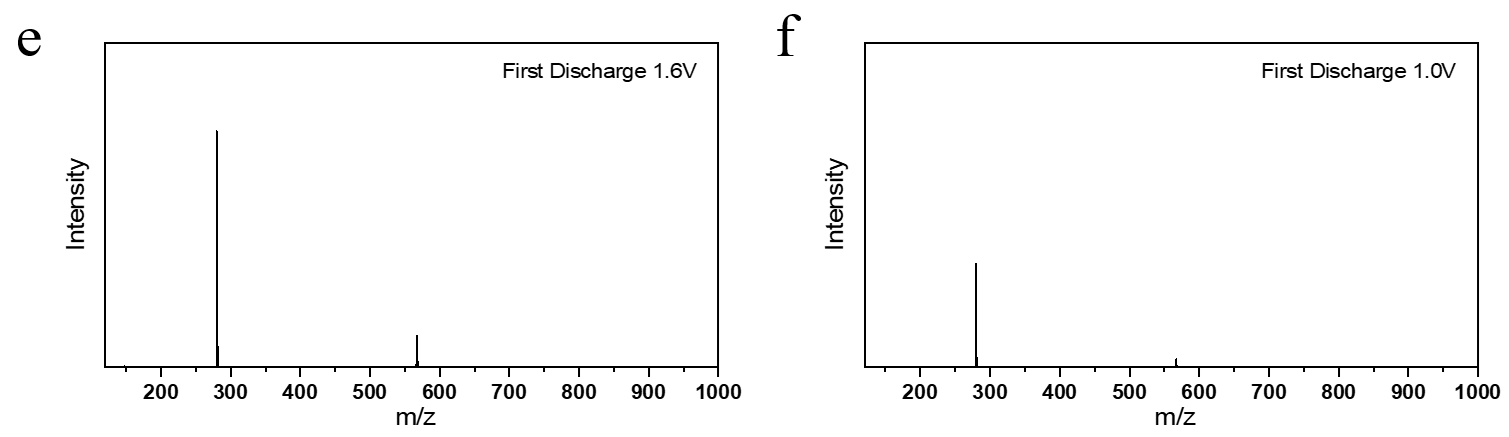


**Figure S3.** 13C NMR spectra of electrolyte during the first discharge process: (a) 2.7 V; (b) 1.6 V; (c) 1.4 V; (d) 1.0 V; HRMS spectra of electrolyte at first discharge: (e) 1.6 V; (f) 1.0 V.


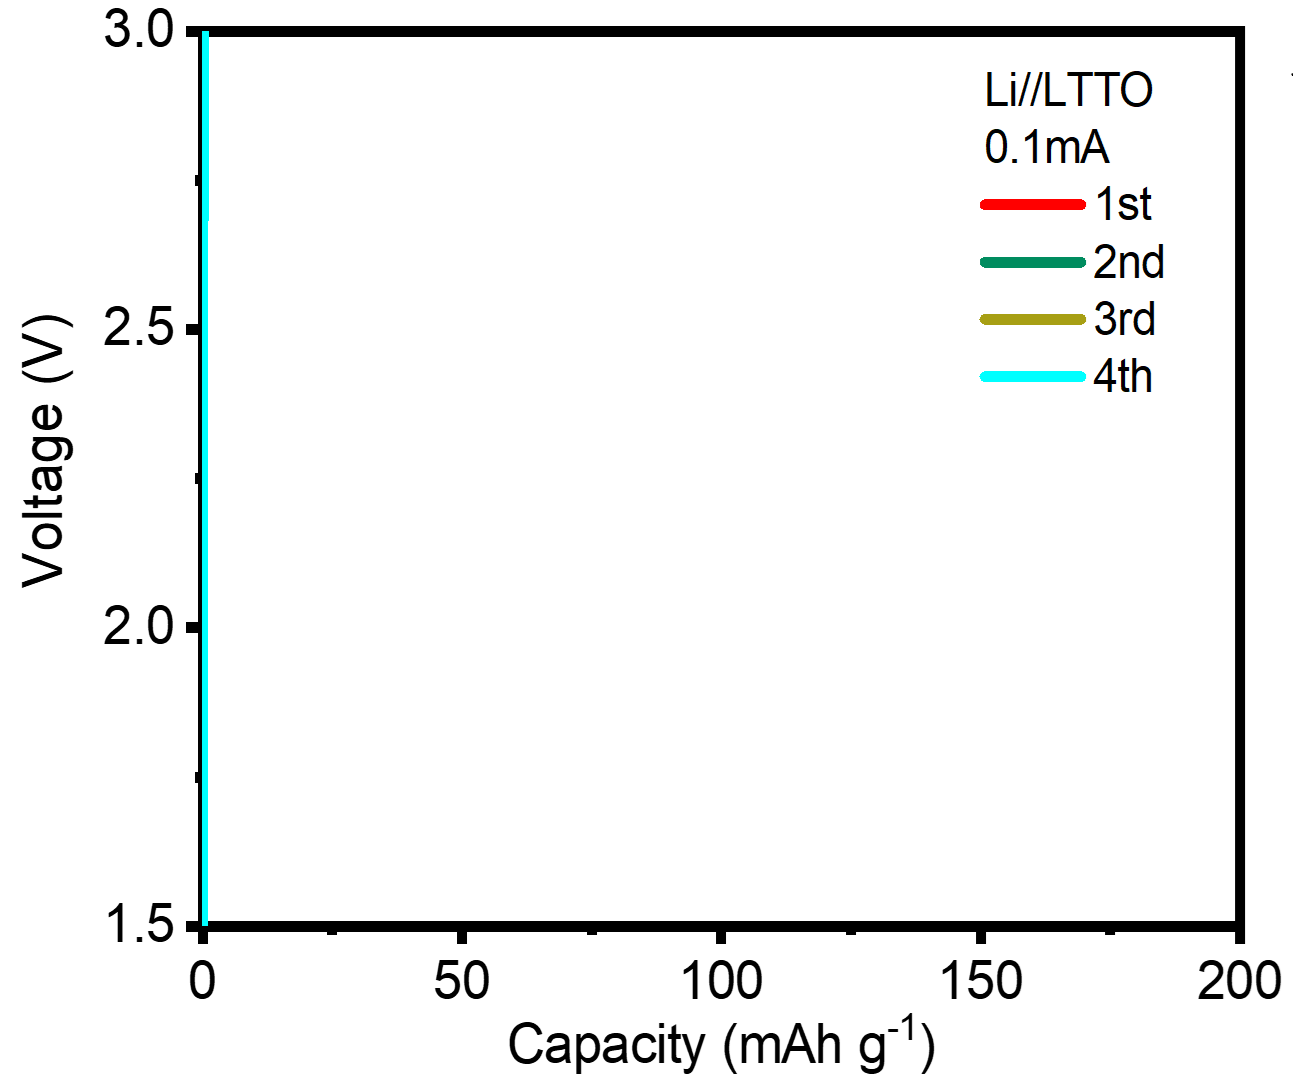


**Figure S4.** The charge/discharge curves of LTTO. (Preparation method: First synthesize LTTO by chemical method, then disperse LTTO in DME, and drop the mixed solution onto carbon paper to obtain the electrode with LTTO. Subsequently, assemble a coin battery using the Li//CS2 battery preparation method and perform charge/discharge tests. The specific capacities mentioned above are calculated based on the mass of LTTO.)


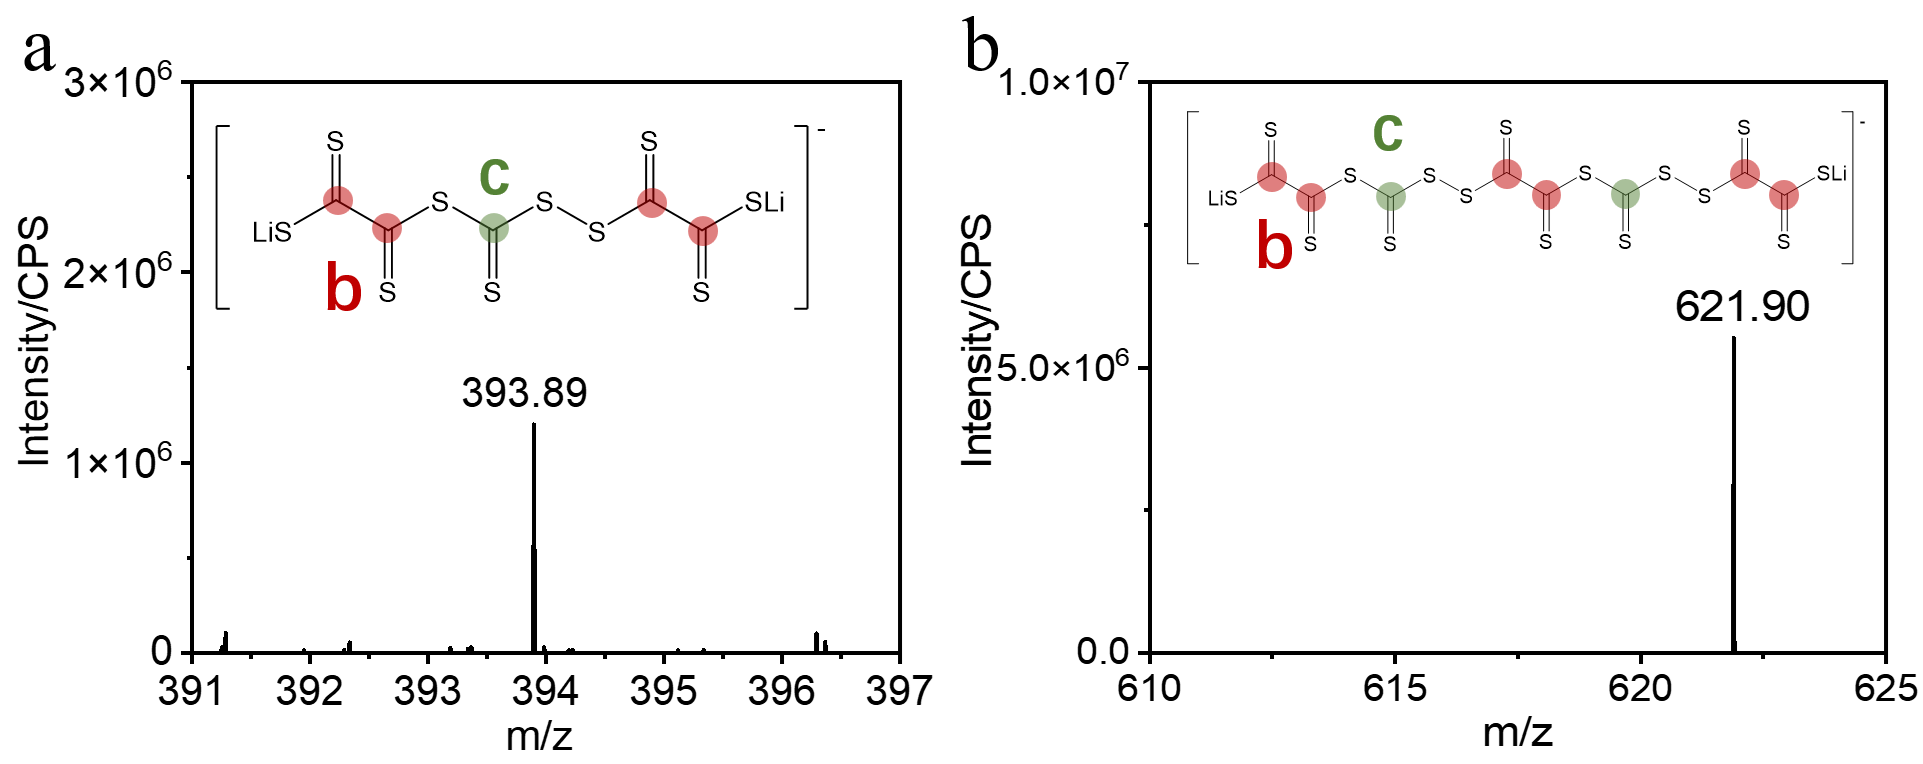


**Figure S5.** HRMS and molecular structure of different substances: (c) Li2C5S10; (d) Li2C8S16.


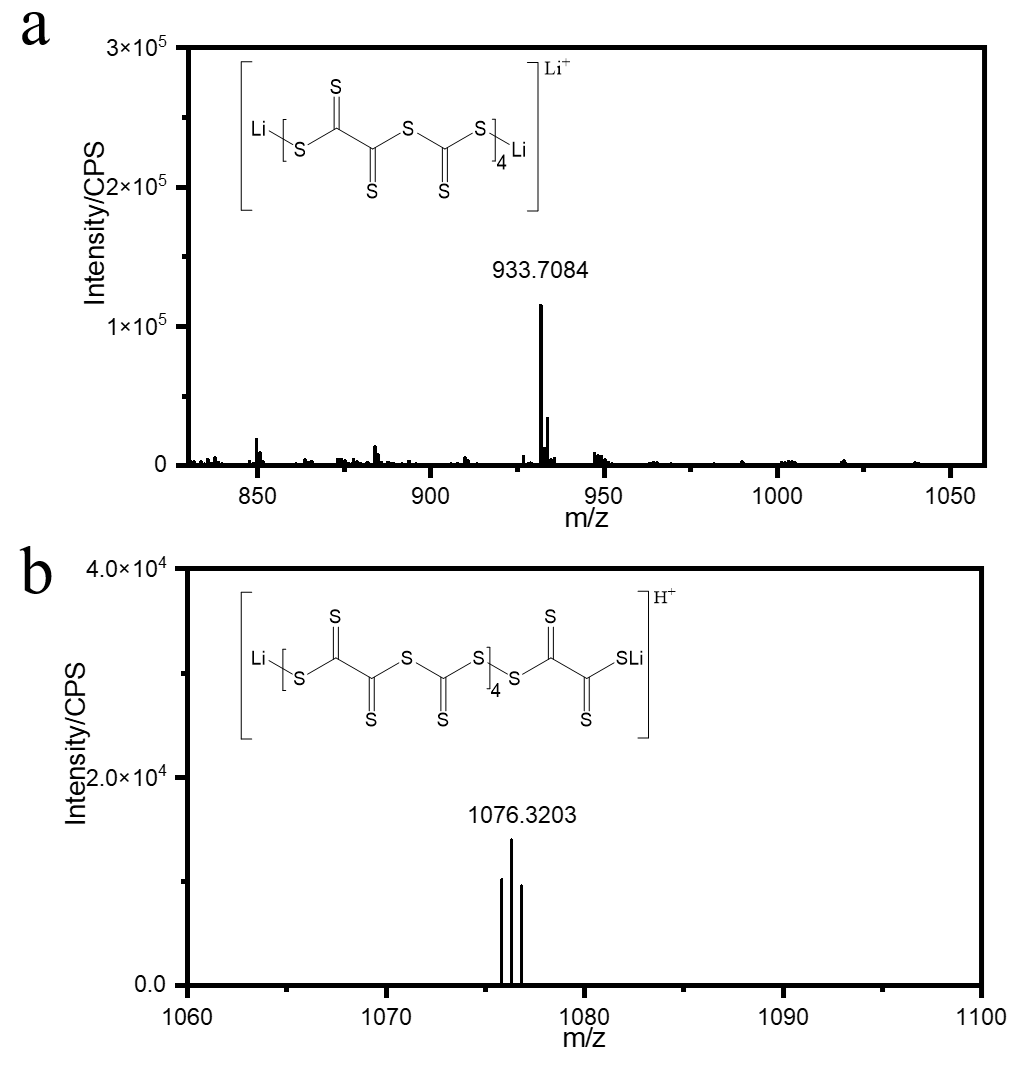


**Figure S6.** HRMS and molecular structure of different Li2CxSy: (a) Li2C12S24; (b) Li2C14S28.


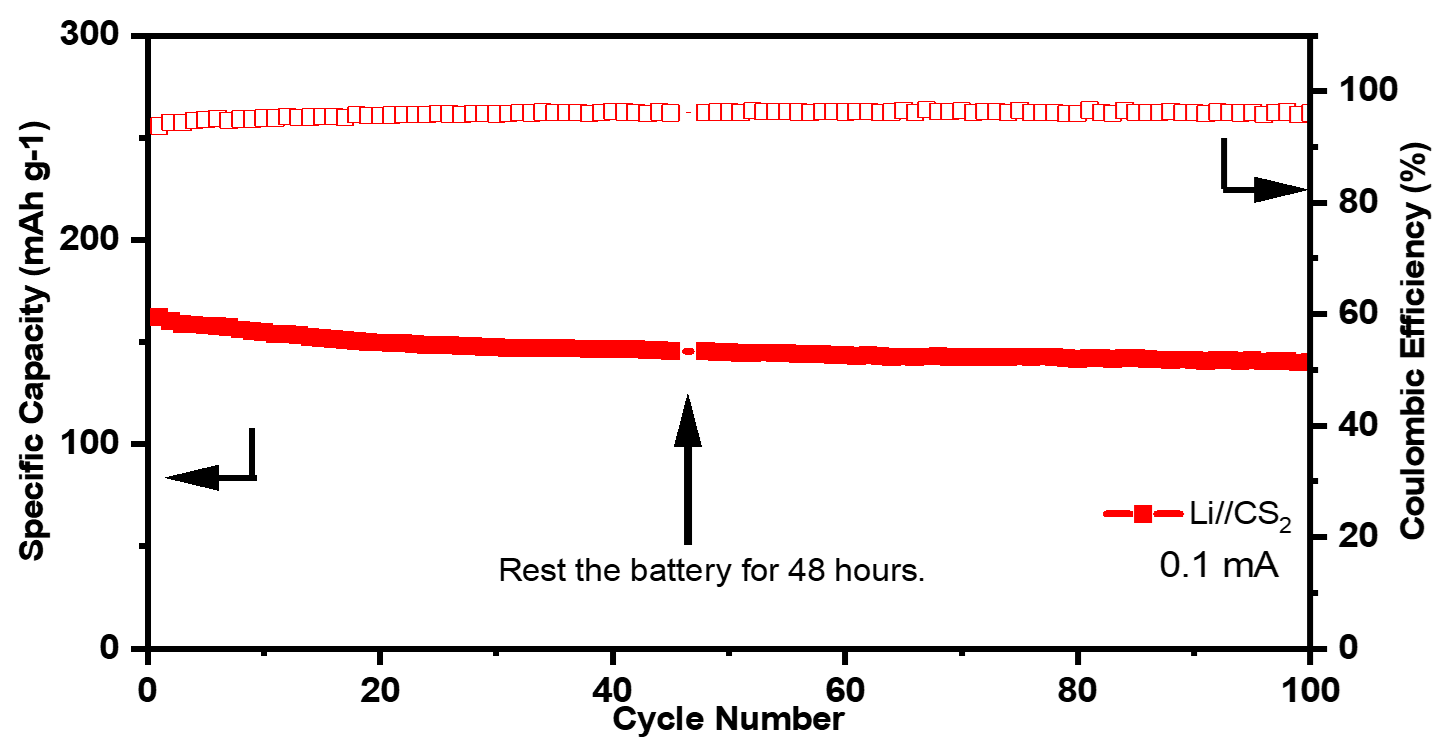


**Figure S7.** Cycle Performance of the Li//CS₂ Battery with a 48-Hour Rest Period at the 45th Cycle.


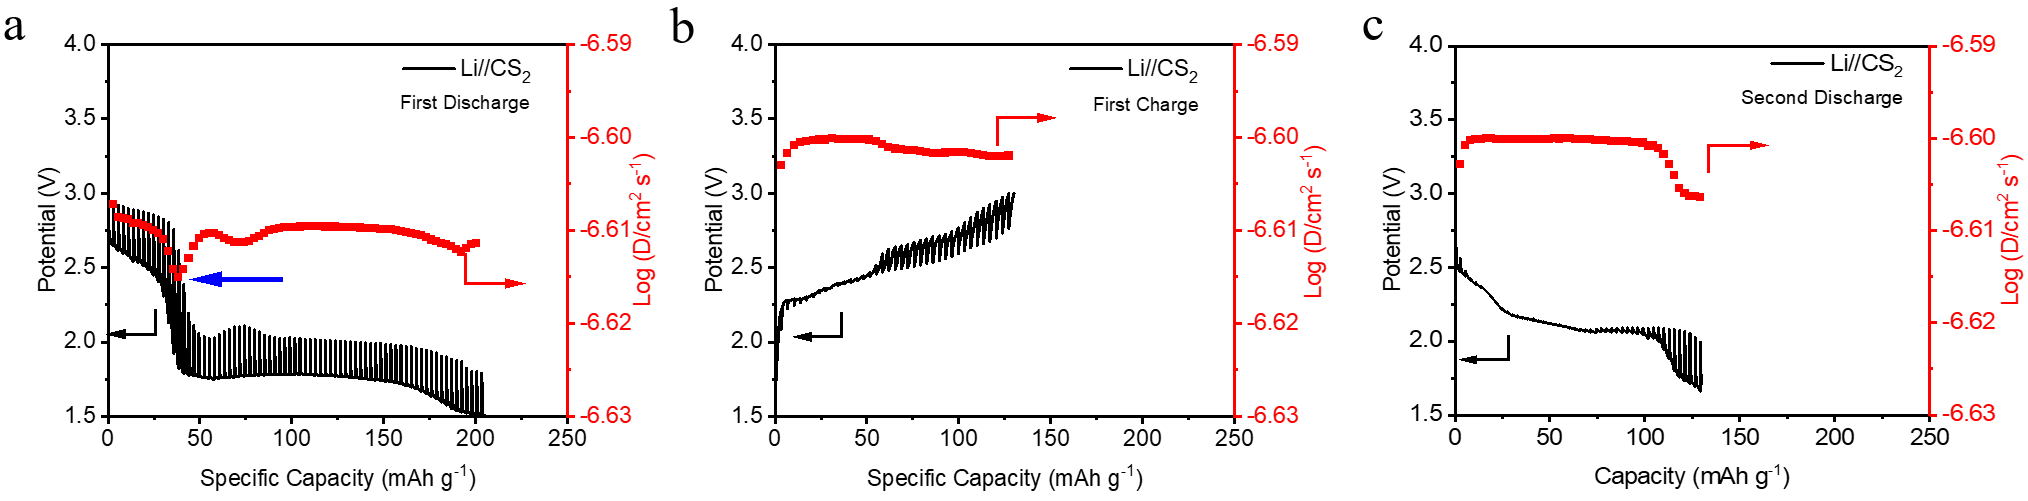


**Figure S8.** (a) Temporal voltage evolution in GITT studies during the first discharge with the corresponding Li-ion diﬀusion coeﬃcients; (b) Temporal voltage evolution in GITT studies during the first charge with the corresponding Li-ion diﬀusion coeﬃcients; (c) Temporal voltage evolution in GITT studies during the second discharge with the corresponding Li-ion diﬀusion coeﬃcients. (The specific capacity of the battery is calculated based on the mass of CS2)


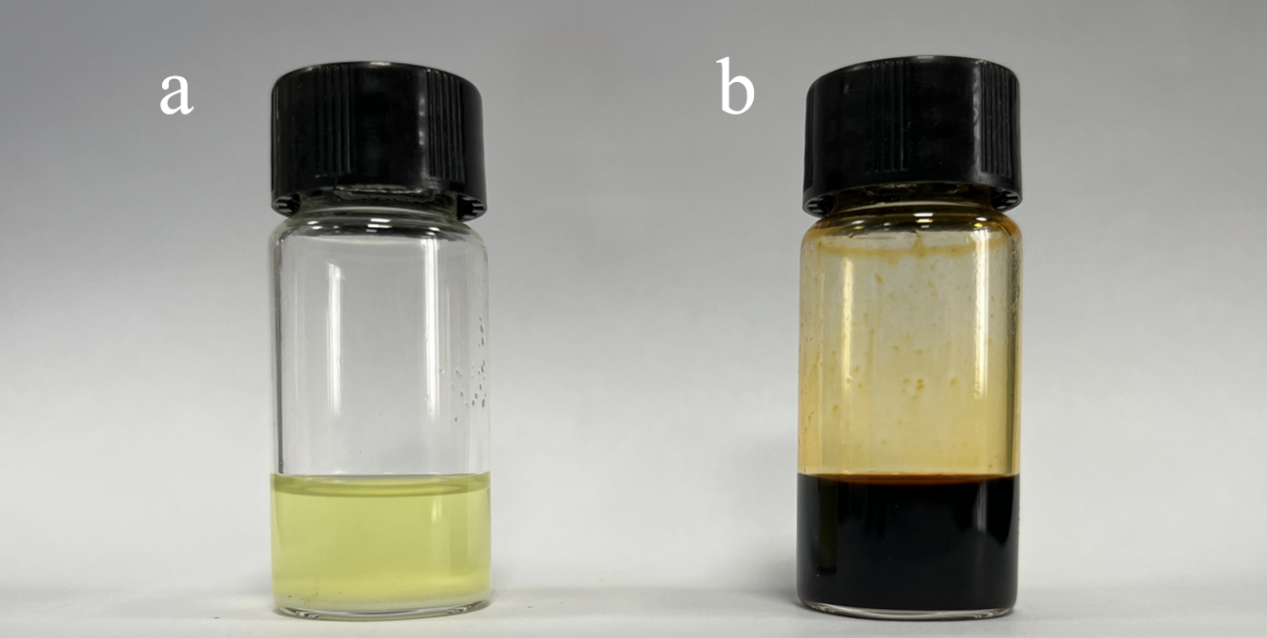


**Figure S9.** Solubility tests of LTTO and LTAT:(a) Dissolution behavior of 10 wt% LTTO in DME/DOL solvent;（b）Dissolution behavior of LTAT in DME/DOL solvent. (The LTAT solution is obtained through the reaction of 5 wt% LTTO with 5 wt% CS2 catalyzed by lithium metal)


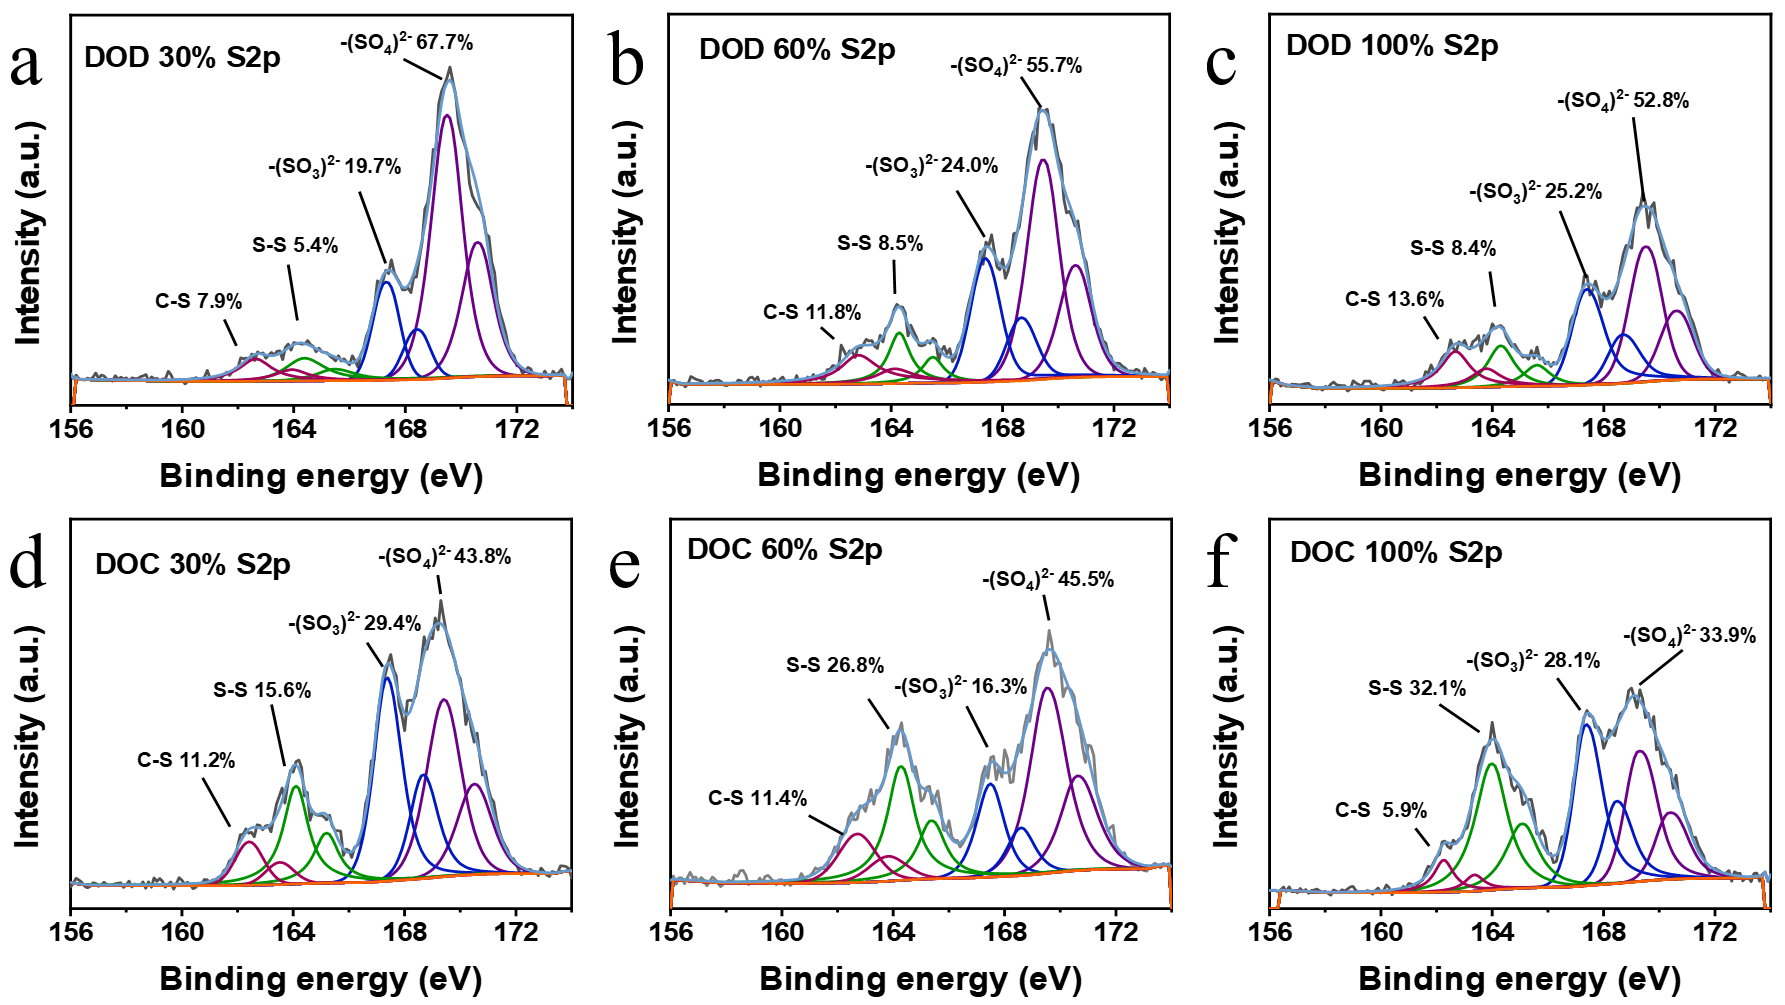


**Figure S10.** High-resolution XPS spectra of S 2p at different first discharge states: (a) DOD 30%; (b) DOD 60%; (c) DOD 100% and first charge potentials: (d) DOC 30%; (e) DOC 60%; (f) DOC 100%.


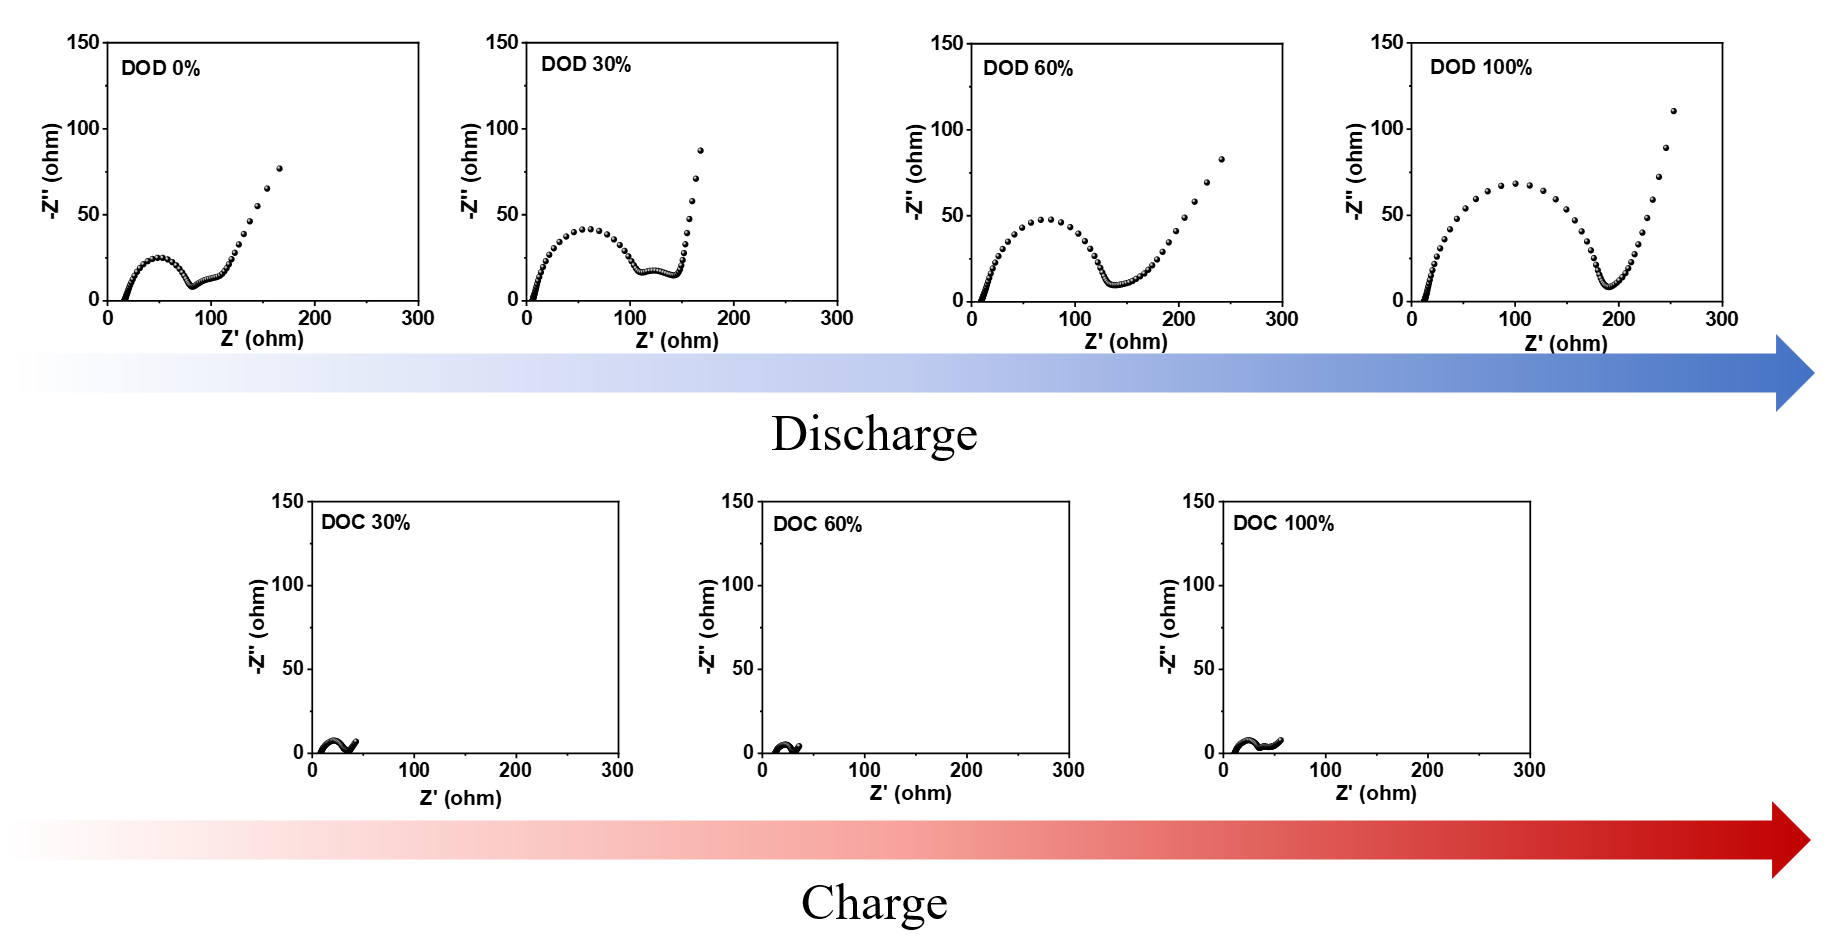


**Figure S11.** Results of in-situ EIS testing of the Li//CS2 battery during the first cycle of charge and discharge.


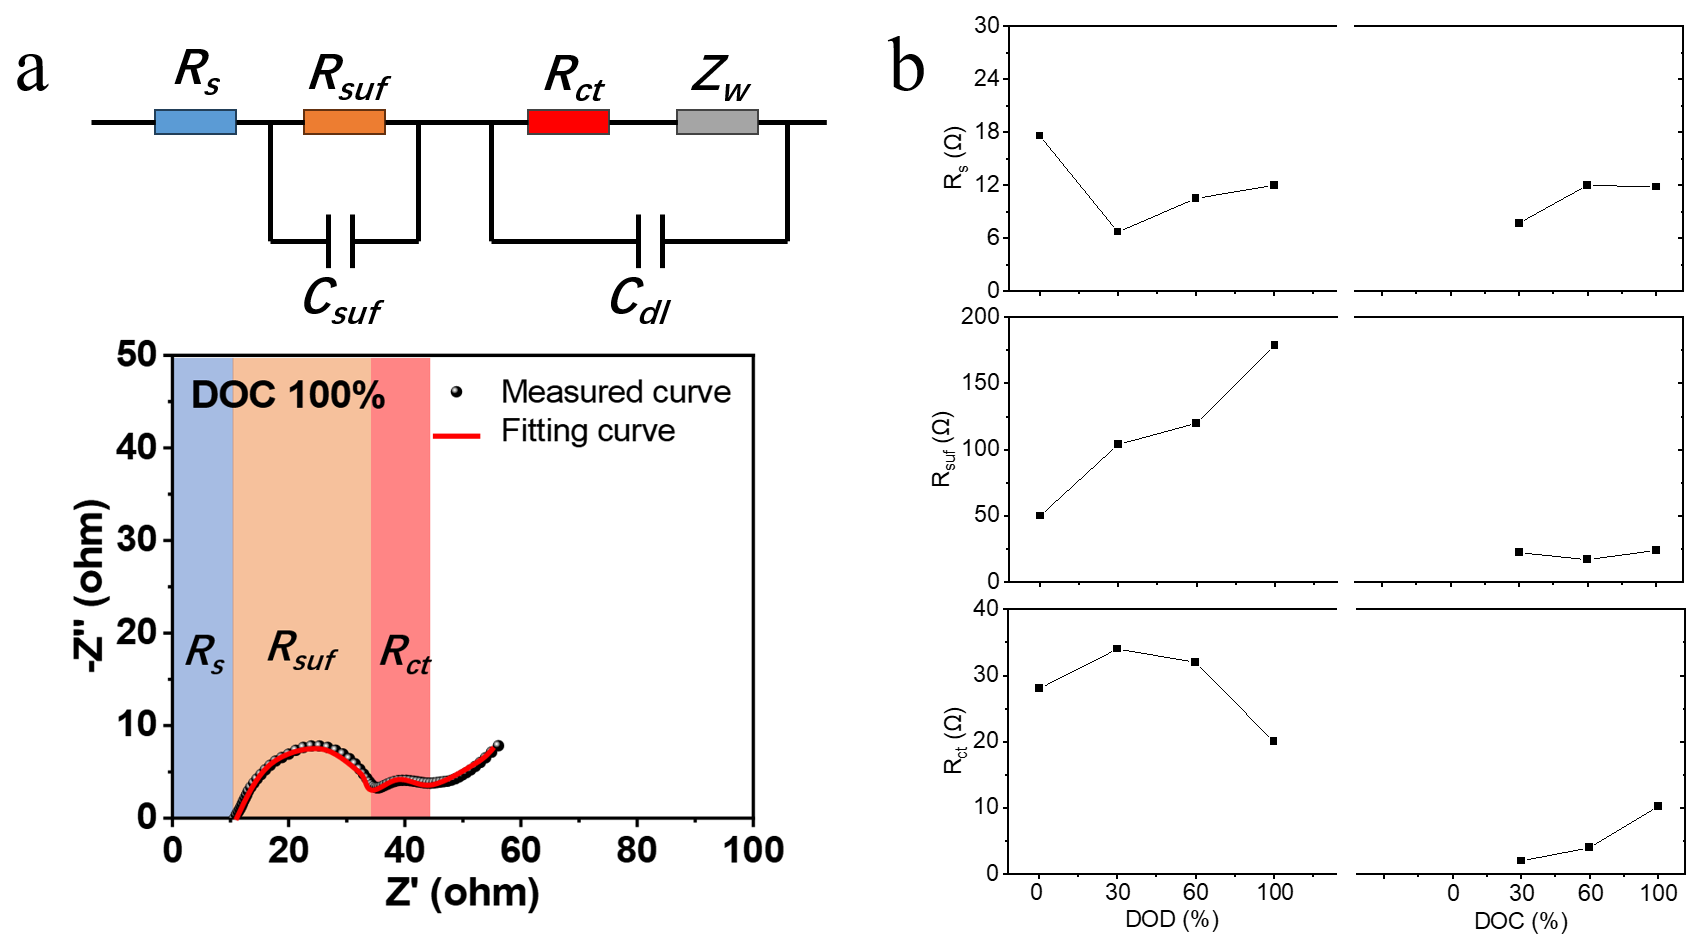


**Figure S12.** (a) EIS curve and equivalent circuit diagram of Li//CS2 battery at 100% DOC; (b) Plots of electrolyte solution resistance (***Rs***), ***Rsuf*** and ***Rct*** against different extent of discharge/charge (DOD/DOC) states.


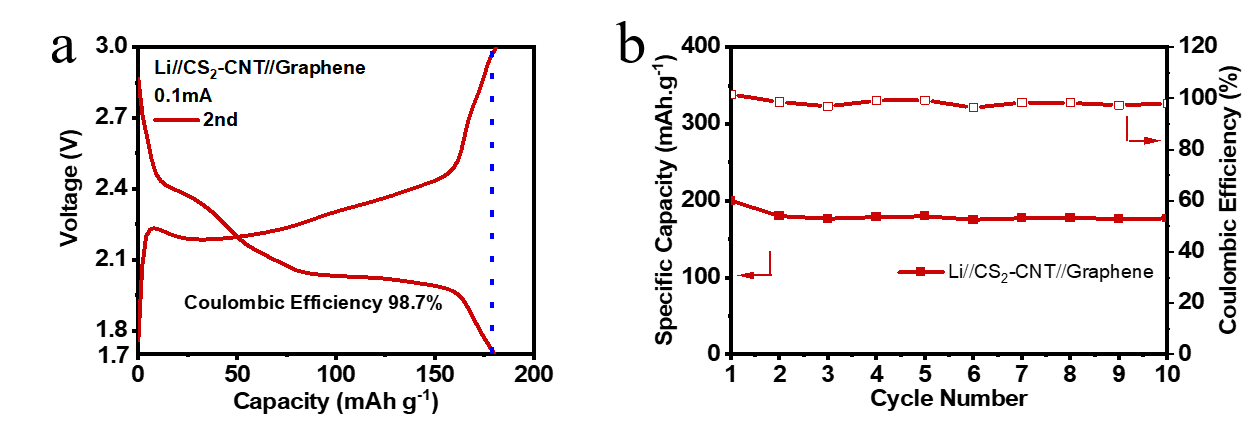


**Figure S13.** (a) The second-cycle charge/discharge curves of the Li//CS2 battery; (b) The cycling performance of the Li//CS2 battery.

| **Material** | **State of matter** | **Can it be dissolved in electrolyte?** | **Mass fraction of sulfur element that can be lithiated** | **Theoretical capacity (mAh g-1)** | **Loading (mg cm-2)** | **Cycling performance (Initial capacity (mAh g-1))** | **Number of cycles (Capacity retention)** | **Ref** |
| --- | --- | --- | --- | --- | --- | --- | --- | --- |
| Tetramethyl thiuram monosulfide | Solid | Yes | - | - | 2.0 | 125 (10C) | 8000 (70%) | 1 |
| C6S6 | Solid | No | 72.7% | 609.0 | 0.8-1.2 | 125 (0.1C) | 200 (-60%) | 2 |
| Phenyl disulfide | Solid | No | 27.8% | 245.5 | 5.0 | 218 (1C) | 150 (70%) | 3 |
| 1,2-benzenedithiol | Solid | Yes | 45.7% | 347.8 | 2.0 | 336.8 (1C) | 150 (70%) | 4 |
| Phenyl selenosulfide | Solid | Yes | 43.5% | 202.1 | 2.7 | 152 (0.2) | 200 (52%) | 5 |
| 2,2’-dipyridyl disulfide | Solid | Yes | 29.1% | 243 | 1.1 | 237 (0.5C) | 500 (69%) | 6 |
| Tetramethylthiuram disulfide | Solid | No | 29.6% | 496.3 | 1.8 | ~300 (0.2C) | 200 (75%) | 7 |
| Diphenyl trisulﬁde | Solid | Yes | 53.9% | 428.8 | 3.9 | 330 (0.5C) | 100 (79%) | 8 |
| Carbon disulfide | Liquid | Yes | 42.1% | 235 | 5.8 | 163 (1.0 mA cm-2) | 6000 (60%) | This work |

(1) Chen, Q.; Li, L.; Wang, W.; Li, X.; Guo, W.; Fu, Y. Thiuram Monosulfide with Ultrahigh Redox Activity Triggered by Electrochemical Oxidation. *Journal of the American Chemical Society* **2022,** *144* (41), 18918.

(2) Preefer, M. B.; Oschmann, B.; Hawker, C. J.; Seshadri, R.; Wudl, F. High Sulfur Content Material with Stable Cycling in Lithium-Sulfur Batteries. *Angew. Chem., Int. Ed.* **2017,** *56* (47), 15118.

(3) Bhargav, A.; Patil, S. V.; Fu, Y. A phenyl disulfide@CNT composite cathode for rechargeable lithium batteries. *Sustainable Energy & Fuels* **2017,** *1* (5), 1007.

(4) Li, F.; Si, Y.; Liu, B.; Li, Z.; Fu, Y. Lithium Benzenedithiolate Catholytes for Rechargeable Lithium Batteries. *Advanced Functional Materials* **2019,** *29* (32).

(5) Guo, W.; Bhargav, A.; Ackerson, J. D.; Cui, Y.; Ma, Y.; Fu, Y. Mixture is better: enhanced electrochemical performance of phenyl selenosulfide in rechargeable lithium batteries. *Chem Commun (Camb)* **2018,** *54* (64), 8873.

(6) Wang, D.-Y.; Si, Y.; Li, J.; Fu, Y. Tuning the electrochemical behavior of organodisulfides in rechargeable lithium batteries using N-containing heterocycles. *Journal of Materials Chemistry A* **2019,** *7* (13), 7423.

(7) Xu, H.; Shi, Y.; Yang, S.; Li, B. A linear molecule sulfur-rich organic cathode material for high performance lithium–sulfur batteries. *Journal of Power Sources* **2019,** *430*, 210.

(8) Wu, M.; Bhargav, A.; Cui, Y.; Siegel, A.; Agarwal, M.; Ma, Y.; Fu, Y. Highly Reversible Diphenyl Trisulfide Catholyte for Rechargeable Lithium Batteries. *ACS Energy Letters* **2016,** *1* (6), 1221.
